# Supplementary material
Source: PubMed Central journal article supplement (PMC6016704)
Supplement: kfy075_supp.pdf [file kfy075_supp.pdf]

# Supplemental Figure 1

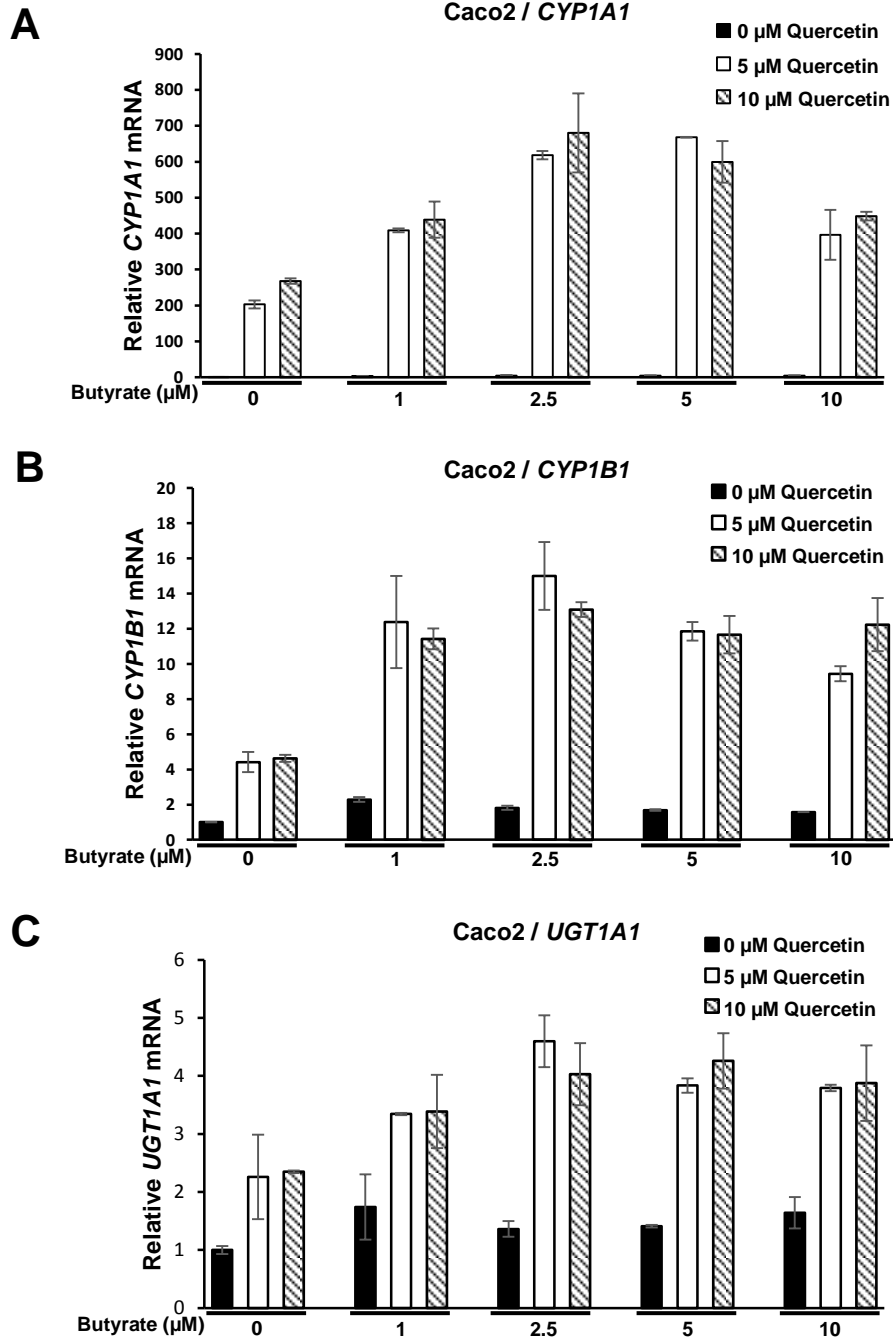

**Supplemental Figure 1.** Butyrate enhancement of Ah-responsiveness of quercetin. Cells were treated with 0-10 mM butyrate and 5 or 10 µM quercetin and effects on expression of CYP1A1 (A), CYP1B1 (B) and UGT1A1 (C) were determined by real time PCR. Butyrate (1-10 mM) significantly ( $p < 0.05$ ) enhanced quercetin-induced gene expression.
